# Supplementary material for: Validity Evidence of the Multidimensional Emotional Disorders Inventory among Non-Clinical Spanish University Students
Source: MDPI journal article supplement (doi:10.3390/ijerph18168251), 2021-08-04
Supplement: s1 [file s1]

**Table S1.** Factor loadings and discrimination indices in the 4-factor solution suggested by the exploratory factor analysis

| Items | F1             | F2             | F3              | F4             | Items | F1             | F2             | F3              | F4             |
|-------|----------------|----------------|-----------------|----------------|-------|----------------|----------------|-----------------|----------------|
| 1.    |                |                |                 | 0.38<br>(0.46) | 26.   |                |                |                 | 0.43<br>(0.51) |
| 2.    |                |                | -0.63<br>(0.40) |                | 27.   | 0.42<br>(0.64) |                |                 |                |
| 3.    |                |                | 0.50<br>(0.67)  |                | 28.   |                |                |                 | 0.75<br>(0.52) |
| 4.    |                |                |                 | 0.49<br>(0.47) | 29.   | 1.06<br>(0.73) |                |                 |                |
| 5.    |                |                |                 | 0.41<br>(0.49) | 30.   | 0.53<br>(0.66) |                |                 |                |
| 6.    |                |                |                 | 0.57<br>(0.52) | 31.   | 0.38<br>(0.38) |                |                 |                |
| 7.    |                | 0.77<br>(0.74) |                 |                | 32.   |                |                |                 | 0.57<br>(0.60) |
| 8.    | 0.78<br>(0.75) |                |                 |                | 33.   |                |                | -0.64<br>(0.46) |                |
| 9.    | 0.36<br>(0.41) |                |                 |                | 34.   |                | 0.40<br>(0.34) |                 |                |
| 10.   |                |                |                 | 0.62<br>(0.58) | 35.   |                |                |                 | 0.35<br>(0.48) |
| 11.   |                |                | 0.61<br>(0.73)  |                | 36.   |                |                | -0.51<br>(0.40) |                |
| 12.   | 0.59<br>(0.72) |                |                 |                | 37.   |                |                | 0.66<br>(0.72)  |                |
| 13.   |                |                |                 | 0.46<br>(0.61) | 38.   |                |                |                 | 0.76<br>(0.52) |
| 14.   |                | 0.79<br>(0.71) |                 |                | 39.   | 0.65<br>(0.72) |                |                 |                |
| 15.   |                | 0.38<br>(0.40) | -0.32           |                | 40.   | 0.63<br>(0.68) |                |                 |                |
| 16.   |                | 0.31           |                 | 0.37<br>(0.57) | 41.   |                | 0.80<br>(0.78) |                 |                |
| 17.   |                |                | -0.44<br>(0.54) |                | 42.   | 0.58<br>(0.53) |                |                 |                |
| 18.   | 0.38<br>(0.58) |                |                 | 0.38           | 43.   | 0.37           |                | 0.49<br>(0.57)  |                |
| 19.   |                |                |                 | 0.68<br>(0.27) | 44.   |                |                |                 | 0.49<br>(0.55) |
| 20.   | 0.75<br>(0.56) |                |                 |                | 45.   |                |                | 0.36            | 0.53<br>(0.53) |
| 21.   | 0.53<br>(0.74) |                |                 |                | 46.   |                |                |                 | 0.39<br>(0.58) |
| 22.   |                | 0.74<br>(0.75) |                 |                | 47.   |                | 0.88<br>(0.81) |                 |                |
| 23.   | 0.40<br>(0.42) |                |                 |                | 48.   | 0.79<br>(0.64) |                |                 |                |
| 24.   |                |                | -0.81           |                | 49.   | 0.30           |                |                 |                |

|     |        |          |        |      |      |      |
|-----|--------|----------|--------|------|------|------|
|     | (0.68) |          | (0.55) |      |      |      |
| 25. | 0.53   | $\alpha$ | 0.91   | 0.87 | 0.86 | 0.87 |
|     | (0.58) |          |        |      |      |      |

**Note.** Factor loadings (discrimination indices).  $\alpha$ : Cronbach's alpha

In the table above, the items that belong to each of the 4 factors of the structure proposed by the exploratory factor analysis appear. For a more theoretical and rapid understanding, the relationship between the 4-factor structure and the original 9-factor structure [6] is shown below. Factor 1 is made up of 7 items from the original avoidance subscale (AVD), 5 items from the traumatic re-experiencing (TRM), 4 items from the intrusive cognitions (IC), and 1 from autonomic arousal (AA). Factor 2 is made up of 5 items from the original social anxiety subscale (SOC), and 2 avoidance items (AVD). Factor 3 is composed of 5 items of positive temperament (PT), which saturate with a negative sign, and 5 items of depressed mood (DM). Finally, Factor 4 is made up of 5 items from the neurotic temperament (NT) subscale, 4 items from autonomic arousal (AA), 2 items from intrusive cognitions (IC) and 5 items from somatic anxiety (SOM).

**Table S2.** Pearson correlations between the MEDI (9-factor solution), NEO-FFI, ASI, BFNE, DASS-14-A, DASS-14-D, OCI-R, DTS and BEAQ

|                        | 2          | 3          | 4          | 5         | 6          | 7          | 8          | 9          | 10         | 11         | 12         | 13         | 14         | 15         | 16         | 17         | 18         |
|------------------------|------------|------------|------------|-----------|------------|------------|------------|------------|------------|------------|------------|------------|------------|------------|------------|------------|------------|
| <b>1.<br/>NT</b>       | -.31<br>2* | .53<br>6*  | .53<br>5*  | .45<br>3* | .43<br>5*  | .58<br>3*  | .50<br>3*  | .60<br>6*  | .73<br>3*  | -.28<br>6* | .38<br>1*  | .57<br>5*  | .50<br>9*  | .46<br>9*  | .49<br>1*  | .46<br>2*  | .48<br>9*  |
| <b>2.<br/>PT</b>       | 1          | -.56<br>0* | -.16<br>3* | -.03<br>1 | -.35<br>4* | -.34<br>5* | -.23<br>3* | -.16<br>2† | -.49<br>2* | .59<br>0*  | -.13<br>1* | -.29<br>2* | -.25<br>3* | -.52<br>6* | -.19<br>3* | -.24<br>5* | -.34<br>3* |
| <b>3.<br/>DM</b>       |            | 1          | .53<br>9*  | .29<br>0* | .43<br>2*  | .61<br>5*  | .54<br>4*  | .51<br>4*  | .69<br>4*  | -.48<br>2* | .24<br>7*  | .42<br>3*  | .52<br>6*  | .80<br>6*  | .41<br>6*  | .57<br>4*  | .56<br>9*  |
| <b>4.<br/>AA</b>       |            |            | 1          | .49<br>9* | .36<br>2*  | .64<br>8*  | .55<br>0*  | .54<br>1*  | .60<br>5*  | -.19<br>4* | .49<br>2*  | .39<br>3*  | .74<br>1*  | .48<br>7*  | .40<br>4*  | .49<br>8*  | .42<br>1*  |
| <b>5.<br/>SO<br/>M</b> |            |            |            | 1         | .23<br>4*  | .47<br>5*  | .39<br>0*  | .45<br>9*  | .37<br>4*  | -.10<br>5† | .53<br>1*  | .27<br>6*  | .38<br>1*  | .24<br>1*  | .27<br>1*  | .18<br>7*  | .30<br>6*  |
| <b>6.<br/>SO<br/>C</b> |            |            |            |           | 1          | .46<br>9*  | .43<br>2*  | .44<br>5*  | .42<br>5*  | -.72<br>2* | .21<br>3*  | .49<br>3*  | .39<br>4*  | .38<br>8*  | .29<br>7*  | .31<br>1*  | .39<br>2*  |
| <b>7.<br/>IC</b>       |            |            |            |           |            | 1          | .72<br>0*  | .63<br>5*  | .70<br>0*  | -.35<br>4* | .40<br>7*  | .48<br>0*  | .54<br>7*  | .58<br>3*  | .51<br>9*  | .52<br>6*  | .53<br>2*  |
| <b>8.<br/>TR<br/>M</b> |            |            |            |           |            |            | 1          | .64<br>2*  | .60<br>7*  | -.31<br>4* | .31<br>8*  | .42<br>8*  | .48<br>9*  | .50<br>1*  | .43<br>6*  | .62<br>9*  | .48<br>4*  |
| <b>9.<br/>AV<br/>D</b> |            |            |            |           |            |            |            | 1          | .57<br>4*  | -.26<br>3* | .35<br>7*  | .48<br>1*  | .45<br>5*  | .42<br>8*  | .50<br>6*  | .52<br>3*  | .66<br>9*  |

|                              |   |                |           |            |            |            |            |            |           |
|------------------------------|---|----------------|-----------|------------|------------|------------|------------|------------|-----------|
| 10.<br>NE<br>O-<br>FFI<br>N  | 1 | -<br>.36<br>1* | .40<br>2* | .56<br>7*  | .60<br>0*  | .67<br>2*  | .49<br>8*  | .55<br>6*  | .58<br>3* |
| 11.<br>NE<br>O-<br>FFI<br>E  |   | 1              | -.14<br>3 | -.32<br>2* | -.24<br>0* | -.42<br>5* | -.20<br>1* | -.25<br>2* | -.29<br>9 |
| 12.<br>ASI                   |   |                | 1         | .32<br>5*  | .65<br>6*  | .59<br>4*  | .30<br>1*  | .25<br>5*  | .27<br>3* |
| 13.<br>BF<br>NE              |   |                |           | 1          | .50<br>2*  | .73<br>3*  | .41<br>6*  | .35<br>8*  | .49<br>2* |
| 14.<br>DA<br>SS-<br>14-<br>A |   |                |           |            | 1          | .59<br>5*  | .48<br>5*  | .58<br>8*  | .43<br>5* |
| 15.<br>DA<br>SS-<br>14-<br>D |   |                |           |            |            | 1          | .47<br>3*  | .61<br>3*  | .53<br>5* |
| 16.<br>OCI<br>-R             |   |                |           |            |            |            | 1          | .49<br>5*  | .49<br>8* |
| 17.<br>DT<br>S               |   |                |           |            |            |            |            | 1          | .56<br>9* |
| 18.<br>BE<br>AQ              |   |                |           |            |            |            |            |            | 1         |

**Note.** MEDI: Multidimensional Emotional Disorder Inventory; NEO-FFI: NEO Five-Factor Inventory; N: Neuroticism; E: Extraversion; ASI: Anxiety Severity Index, Somatic anxiety subscale; BFNE: Brief version of the Fear of Negative Evaluation Scale; DASS-14-A: Anxiety subscale of the Depression, Anxiety and Stress Scales-14; DASS-14-D: Depression subscale of the Depression, Anxiety and Stress Scales-14; OCI-R: Obsessing scale of the Revised Obsessive–Compulsive Inventory; DTS: Davidson Trauma Scale; BEAQ: Brief experiential avoidance questionnaire; NT: Neurotic temperament; PT: Positive temperament; DM: Depressed mood; AA: Automatic arousal; SOM: Somatic anxiety; SOC: Social anxiety; IC: Intrusive cognitions; TRM: Traumatic re-experiencing; AVD: avoidance.

†  $p < .05$  \*  $p < .001$

**Table S3.** Pearson correlations between the MEDI (4-factor solution), NEO-FFI, ASI, BFNE, DASS-14-A, DASS-14-D, OCI-R, DTS and BEAQ

|               | 2     | 3     | 4     | 5     | 6      | 7      | 8      | 9      | 10     | 11     | 12     | 13     |
|---------------|-------|-------|-------|-------|--------|--------|--------|--------|--------|--------|--------|--------|
| 1. F1         | .570* | .502* | .753* | .715* | -.325* | .406*  | .529*  | .580*  | .575*  | .545*  | .631*  | .627*  |
| 2. F2         | 1     | .241* | .522* | .466* | -.679* | .262*  | .513*  | .410*  | .402*  | .366*  | .377*  | .488*  |
| 3. F3         |       | 1     | .461* | .362* | -.025  | .168*  | .223*  | .379*  | .455*  | .307*  | .419*  | .335*  |
| 4. F4         |       |       | 1     | .728* | -.273* | .567*  | .523*  | .663*  | .516*  | .499*  | .522*  | .525*  |
| 5. NEO-FFI N  |       |       |       | 1     | -.361* | .402*  | .567*  | .600*  | .672*  | .498*  | .556*  | .583*  |
| 6. NEO-FFI E  |       |       |       |       | 1      | -.143* | -.322* | -.240* | -.425* | -.201* | -.252* | -.299* |
| 7. ASI        |       |       |       |       |        | 1      | .325*  | .656*  | .594*  | .301*  | .255*  | .273*  |
| 8. BFNE       |       |       |       |       |        |        | 1      | .502*  | .733*  | .416*  | .358*  | .492*  |
| 9. DASS-14-A  |       |       |       |       |        |        |        | 1      | .595*  | .485*  | .588*  | .435*  |
| 10. DASS-14-D |       |       |       |       |        |        |        |        | 1      | .473*  | .613*  | .535*  |
| 11. OCI-R     |       |       |       |       |        |        |        |        |        | 1      | .495*  | .498*  |
| 12. DTS       |       |       |       |       |        |        |        |        |        |        | 1      | .569*  |
| 13. BEAQ      |       |       |       |       |        |        |        |        |        |        |        | 1      |

**Note.** MEDI: Multidimensional Emotional Disorder Inventory; NEO-FFI: NEO Five-Factor Inventory; N: Neuroticism; E: Extraversion; ASI: Anxiety Severity Index, Somatic anxiety subscale; BFNE: Brief version of the Fear of Negative Evaluation Scale; DASS-14-A: Anxiety subscale of the Depression, Anxiety and Stress Scales-14; DASS-14-D: Depression subscale of the Depression, Anxiety and Stress Scales-14; OCI-R: Obsessing scale of the Revised Obsessive–Compulsive Inventory; DTS: Davidson Trauma Scale; BEAQ: Brief experiential avoidance questionnaire.

†  $p < .05$  \*  $p < .001$

**Table S4.** Sex differences in MEDI 4-factor scales total scores

|           | Total sample<br><i>n</i> = 455 | Females<br><i>n</i> = 387 | Males<br><i>n</i> = 66 | F     | p-value |
|-----------|--------------------------------|---------------------------|------------------------|-------|---------|
| <b>F1</b> | 28.01 (21.87)                  | 28.11 (21.72)             | 27.42 (22.94)          | 0,055 | ,815    |
| <b>F2</b> | 20.43 (12.28)                  | 20.82 (12.09)             | 18.17 (13.16)          | 2,647 | ,104    |
| <b>F3</b> | 37.52 (7.25)                   | 37.43 (7.01)              | 38.02 (8.56)           | 0,365 | ,546    |
| <b>F4</b> | 40.78 (20.94)                  | 41.17 (20.93)             | 38.50 (21.03)          | 0,917 | ,339    |

**Note.** Mean (Standard deviation)

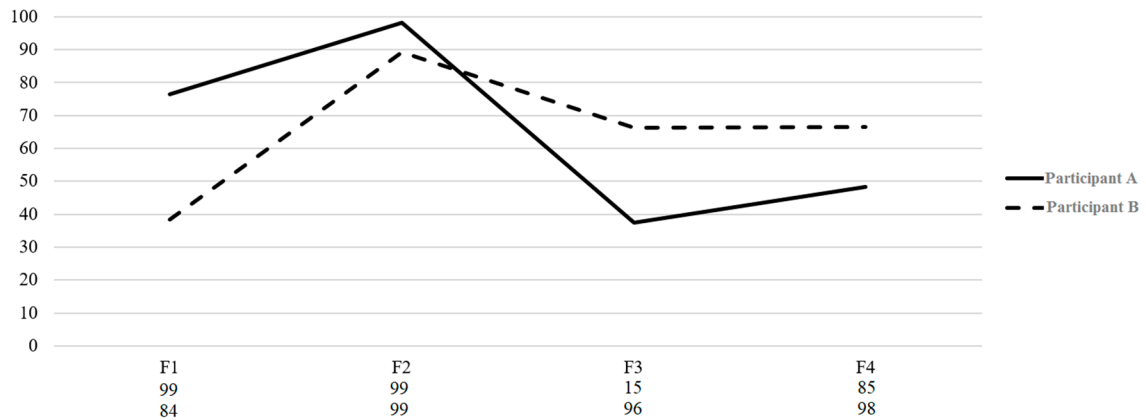

**Figure S1.** Profiles of two participants according to their scores in each 4-factor MEDI scale.

*Legend.* The Y-axis represents the percentage of the score obtained in each dimension over the maximum score. Scores under each dimension represent the participant's percentile
